## Concerning the Possible Nature of Reported Fentanyl Seizures

*To the Editor:*—We have read with interest reports of grand mal seizures associated with the intravenous administration of fentanyl.<sup>1-3</sup> The last correspondence indicated that the seizure occurred after only 100 µg of fentanyl and was so severe that the patient dislocated both shoulders. There was no electroencephalographic documentation of the reported seizure, and studies addressing whether fentanyl can produce cortical seizures documented by EEG in humans have failed to demonstrate such activity.<sup>4,5</sup> Furthermore, none of the patients had neurologic disorders by history or physical examination before or after their reported seizure. Nonetheless, seizure activity can be produced by all narcotic analgesics at extremely high doses (usually 100 times the anesthetic or profoundly analgesic dose) in all experimental animals.<sup>5,6</sup> Furthermore, the possibility of opiate-induced seizures in subcortical structures such as the hippocampus, which conceivably are undetectable by cortical leads, also has been documented.<sup>7</sup> An examination of recent papers in the nonanesthetic literature adds an interesting perspective to these reports.

High-dose morphine in rats (>20 mg/kg) results in a catatonic state consisting of rigidity and catalepsy (akinesia and waxy flexibility). DeRyck and Teitelbaum<sup>8</sup> recently examined the phenomenon of morphine catalepsy and described cortical EEG synchronization and hippocampal activation during this phenomenon. These authors raise the question of whether hippocampal seizures are a feature of the cataleptic state. Should such an association be made, one must question the relevance of narcotic-induced hippocampal activity to the myoclonic movements described in the case reports, since catalepsy is typified by the absence of movement. Given the large species differences in opiate actions, the occurrence of the above mechanisms in primates and/or humans is speculative until more definitive research is done.

Our experiences suggest that rigidity is a more likely explanation for the myoclonic movements described in the above reports. Rigidity commonly occurs with therapeutic doses of narcotics. In experimental work (unpublished), high-dose alfentanil inductions produce rigidity involving all extremities, closely resembling seizures. Like the study of Murkin *et al.*,<sup>4</sup> simultaneous EEG recording during such movements are devoid of seizure activity.

More ominous, perhaps, are nonopiate mechanisms of morphine seizures. This was recently well described in a series of papers beginning with a description by Frenck *et al.*<sup>9</sup> of tonic/clonic movements limited to the

hindlimbs of rats receiving lumbar subarachnoid injections of morphine. These seizures reproduced those seen with large systemic doses and were not naloxone reversible. Injections of methadone or the opioid D-alanmethionine enkephalinamide did not result in seizures but did produce catalepsy. We feel these findings must be of concern, given the current popularity of intrathecal/epidural morphine analgesia and in light of a case report describing catatonia in a patient receiving large doses of epidural morphine.<sup>10</sup>

JAMES L. BENTHUYSEN, M.D.

Department of Anesthesiology  
School of Medicine—TB 170  
University of California  
Davis, CA 95616

THEODORE H. STANLEY, M.D.

Department of Anesthesiology  
University of Utah School of Medicine  
50 North Medical Drive  
Salt Lake City, Utah 84132

## REFERENCES

1. Rao TLK, Mummaneni N, El-Etr AA: Convulsions: An unusual response to intravenous fentanyl administration. *Anesth Analg* 61:1020-1021, 1982
2. Safwat AM, Daniel D: Grand mal seizure after fentanyl administration. *ANESTHESIOLOGY* 59:78, 1983
3. Horen AO: Another case of grand mal seizure after fentanyl administration. *ANESTHESIOLOGY* 60:387-388, 1984
4. Murkin JM, Moldenhauer CC, Hug CC, Epstein CM: Absence of seizures during induction of anesthesia with high-dose fentanyl. *Anesth Analg* 63:484-489, 1984
5. Sebel PS, Bovill JG, Wauquier A, Rog P: Effects of high-dose fentanyl anesthesia on the electroencephalogram. *ANESTHESIOLOGY* 55:203-211, 1981
6. de Castro J, van de Water A, Wouters L, Xhanneux R, Reneman R, Kay B: Comparative study of cardiovascular, neurological and metabolic side effects of eight narcotics in dogs. *Acta Anaesthesiol Belg* 30:6-99, 1979
7. Tommasino C, Maekawa T, Shapiro H: Fentanyl-induced seizures activate subcortical brain metabolism. *ANESTHESIOLOGY* 60:283-290, 1984
8. DeRyck M, Teitelbaum P: Morphine catalepsy as an adaptive reflex state in rats. *Behav Neurosci* 98:243-261, 1984
9. Frenk H, Watkins L, Mayer D: Differential behavioral effects induced by intrathecal microinjection of opiates: Comparison of convulsive and cataleptic effects produced by morphine, methadone and d-alan 2p-methionine-enkephalinamide. *Brain Res* 299:31-42, 1984
10. Engquist A, Jorgensen BC, Anderson HB: Catatonia after epidural morphine. *Acta Anaesthesiol Scand* 25:445-446, 1981

(Accepted for publication September 6, 1984.)
